# Supplementary material for: Two-dimensional porphyrin covalent organic frameworks with tunable catalytic active sites for the oxygen reduction reaction
Source: Royal Society of Chemistry journal article supplement (doi:10.1039/d1cc04928c), 2021-01-01
Supplement: d1cc04928c1.pdf [file d1cc04928c1.pdf]

Supporting information for

**2D Porphyrin Covalent Organic Frameworks with Tunable Catalytic Active Sites for Oxygen Reduction Reaction**

Jie-Yu Yue,<sup>†a</sup> Yu-Tong Wang,<sup>†a</sup> Xin Wu,<sup>†b</sup> Peng Yang,<sup>a</sup> Yu Ma<sup>\*a</sup>, Xuan-He Liu,<sup>\*b</sup> and Bo Tang<sup>\*a</sup>

<sup>a</sup> College of Chemistry, Chemical Engineering and Materials Science, Collaborative Innovation Center of Functionalized Probes for Chemical Imaging in Universities of Shandong, Key Laboratory of Molecular and Nano Probes, Ministry of Education, Institutes of Biomedical Sciences, Shandong Normal University, Jinan, 250014.

<sup>b</sup> School of Science, China University of Geosciences (Beijing), Beijing 100083.

Corresponding Author: Dr. Yu Ma; Dr. Xuan-He Liu; Dr. Bong Tang

\*E-mail: may@sdnu.edu.cn; liuxh@cugb.edu.cn; tangb@sdnu.edu.cn

**1. Supplementary materials**

**1.1 Materials**

5,10,15,20-tetrakis(para-aminophenyl)porphyrin (TAPP) was purchased from Jilin Chinese Academy of Sciences Yanshen Technology Co., Ltd. Pd(PPh<sub>3</sub>)<sub>4</sub>, CoCl<sub>2</sub>·6H<sub>2</sub>O, NiCl<sub>2</sub>·6H<sub>2</sub>O, Mn(OAc)<sub>2</sub> and anhydrous THF were purchased from Energy Chemical. All the chemicals and solvents involved in this work were utilized with no further purification.

**1.2 Instruments**

The powder X-ray diffraction (PXRD) characterization was performed on D8 ADVANCE with Cu K $\alpha$  radiation ( $\lambda = 1.5405 \text{ \AA}$ ) with a  $2\theta$  range from  $2^\circ$  to  $30^\circ$  at room temperature. Fourier transform infrared (FT-IR) Spectra were recorded on

Bruker ALPHA FT-IR Spectrometer ranging from 500 to 4000  $\text{cm}^{-1}$ .  $^1\text{H}$  NMR spectra were acquired on Bruker Avance 400 MHz NMR spectrometers. Solid-state  $^{13}\text{C}$  NMR spectrum was exploited on a Bruker Avance III 400 MHz instrument. Thermogravimetric analysis (TGA) was collected on TGA/SDTA851e in  $\text{N}_2$  atmosphere at  $10\text{ }^\circ\text{C min}^{-1}$  from  $30\text{ }^\circ\text{C}$  to  $1000\text{ }^\circ\text{C}$ . Scanning electron microscopy (SEM) images were recorded on a SUB010 instrument. Transmission electron microscopy (TEM) analysis was conducted on Hitachi HT7700 electron microscope. The Brunauer-Emmett-Teller (BET) surface areas were tested on an ASAP 2020/TriStar 3000 (Micromeritics) at 77 K. Ultraviolet-visible (UV-Vis) spectra were performed on a Hitachi U-4100 spectrophotometer. X-ray photoelectron spectroscopy (XPS) spectra were obtained from PHI Versa probe II.

## **2. Supplementary experimental section**

### **2.1 The synthesis of M-TAPP**

TAPP (500 mg),  $\text{CoCl}_2 \cdot 6\text{H}_2\text{O}$  (1g), 60 mL of DMF, 30 mL of MeOH and 180 mL of  $\text{CHCl}_3$  were added into a 500 mL flask. The reaction system was refluxed under  $\text{N}_2$  for 24 h. The dark purple precipitation was filtered and washed with water and EtOH and dried under vacuum with the yield about 88%.

TAPP (500 mg),  $\text{NiCl}_2 \cdot 6\text{H}_2\text{O}$  (1g), 60 mL of DMF, 30 mL of MeOH and 180 mL of  $\text{CHCl}_3$  were added into a 500 mL flask. The reaction system was refluxed under  $\text{N}_2$  for 24 h. The dark pink precipitation was filtered and washed with water and dried under vacuum with the yield about 85%.

TAPP (500 mg),  $\text{Mn}(\text{OAc})_2$  (1g), 60 mL of DMF, 30 mL of MeOH and 180 mL of

$\text{CHCl}_3$  were added into a 500 mL flask. The reaction system was refluxed for 48 h. The dark green precipitation was filtered and washed with water and dried under vacuum with the yield about 83%.

## 2.2 The synthesis of 1,1,2,2-tetrakis(4-formyl-(1,1'-biphenyl))ethane (TPTE)

TPTE was synthesized according to the reported literature<sup>1</sup> and obtained a yellowish green solid with the yield about 70%.  $^1\text{H NMR}$  (400 MHz,  $\text{DMSO-}d_6$ ):  $\delta$  10.02 (s, 4H), 7.94 (d,  $J = 8.3$  Hz, 8H), 7.91 (d,  $J = 8.2$  Hz, 8H), 7.68 (d,  $J = 8.2$  Hz, 8H), 7.23 (d,  $J = 8.3$  Hz, 8H).

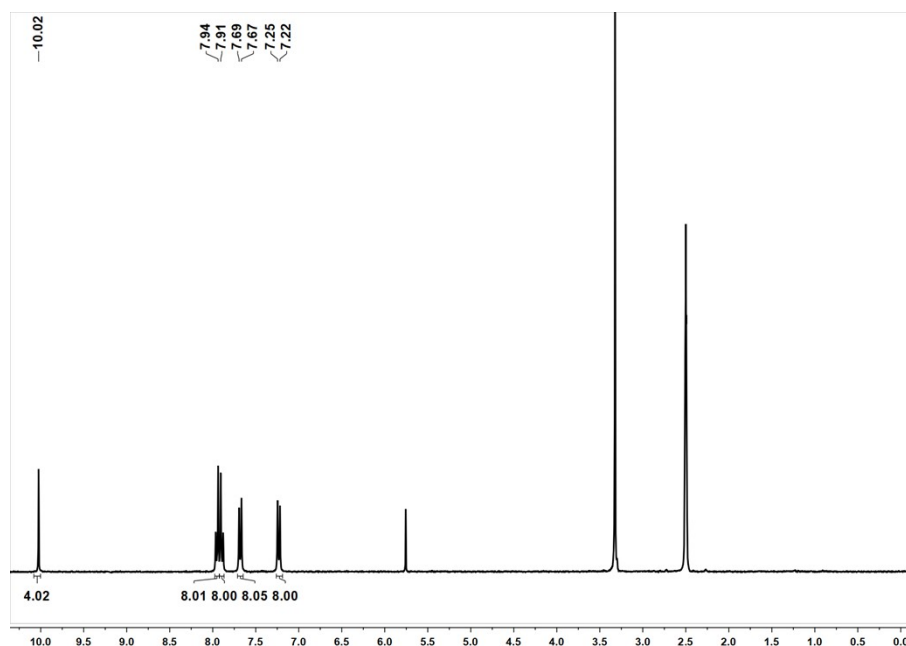

## 2.3 The synthesis of M-TP-COFs

TAPP (0.02 mmol, 13.50 mg), TPTE (0.02 mmol, 14.98 mg), 0.5 mL of *o*-DCB, 0.5 mL of *n*-BuOH were added into a 10 mL glass tube and sonicated for 5 min to get well dispersed. After added 0.1 mL of HAC (6M), the tube was then put into the liquid  $\text{N}_2$  and degassed for freeze-pump-thaw cycles. The glass tube was sealed and put into the oven, heated at 120 °C for 3 days. The mixture was filtered and washed

for 6 times with THF and water. The purple precipitate was then suffered from a Soxhlet extraction with THF for 3 days and dried under vacuum. H-TP-COF with a yield about 90% was obtained.

Co-TAPP (0.02 mmol, 14.62 mg), PTPE (0.02 mmol, 14.98 mg), 0.5 mL of *o*-DCB, 0.5 mL of dioxane were added into a 10 mL glass tube and sonicated for 5 min to get well dispersed. After added 0.1 mL of HAC (6M), the tube was then put into the liquid N<sub>2</sub> and degassed for freeze-pump-thaw cycles. The glass tube was sealed and put into the oven, heated at 120 °C for 3 days. The mixture was filtered and washed for 6 times with THF and water. The dark purple precipitate was then suffered from a Soxhlet extraction with THF for 3 days and dried under vacuum. Co-TP-COF with a yield about 88% was obtained.

Ni-TAPP (0.02 mmol, 14.65 mg), PTPE (0.02 mmol, 14.98 mg), 0.5 mL of *o*-DCB, 0.5 mL of *n*-BuOH were added into a 10 mL glass tube and sonicated for 5 min to get well dispersed. After added 0.1 mL of HAC (6M), the tube was then put into the liquid N<sub>2</sub> and degassed for freeze-pump-thaw cycles. The glass tube was sealed and put into the oven, heated at 120 °C for 3 days. The mixture was filtered and washed for 6 times with THF and water. The dark pink precipitate was then suffered from a Soxhlet extraction with THF for 3 days and dried under vacuum. Ni-TP-COF with a yield about 85% was obtained.

Mn-TAPP (0.02 mmol, 14.63 mg), PTPE (0.02 mmol, 14.98 mg), 0.2 mL of *o*-DCB, 0.8 mL of *n*-BuOH were added into a 10 mL glass tube and sonicated for 5 min to get well dispersed. After added 0.1 mL of HAC (6M), the tube was then put into the

liquid N<sub>2</sub> and degassed for freeze-pump-thaw cycles. The glass tube was sealed and put into the oven, heated at 120 °C for 3 days. The mixture was filtered and washed for 6 times with THF and water. The dark green precipitate was then suffered from a Soxhlet extraction with THF for 3 days and dried under vacuum. Mn-TP-COF with a yield about 86% was obtained.

## **2.4 Electrochemical measurements**

Preparation of ink and working electrode: 3 mg of M-TP-COFs and 7 mg of acetylene black were dispersed in 1.25 mL of ethanol and sonicated for 30 minutes to get a well dispersed black ink. Then 36 μL of ink was loaded on the pre-polished rotating ring disk electrode (RDE, diameter 4 mm) as the working electrode. Finally, a layer of Nafion solution (0.5 wt%) was covered on the RDE and the working electrode was dried at room temperature. A commercial Pt/C catalyst (20 wt%) was prepared under the same conditions as a comparative sample.

Electrochemical test: 0.1 M KOH aqueous solutions were utilized as electrolyte. All electrochemical were tested on electrochemical workstation (Chenhua, China, CHI 760E) and RRDE-3A (ALS, Japan) devices were exploited to measure ORR performance. The Ag/AgCl (KCl-saturated) electrode was used as the reference electrode and the graphite rod electrode was used as the counter electrode. The cyclic voltammetry (CV) was performed at the scan rate of 50 mV s<sup>-1</sup> and the linear scan voltammetry (LSV) was measured at the scan rate of 50 mV s<sup>-1</sup>. Before the ORR test, the electrolyte was saturated with oxygen for 30 minutes. LSV test was done in N<sub>2</sub> saturated and O<sub>2</sub> saturated electrolyte, respectively. The platinum ring potential of the

RRDE was fixed at 0.7 V and RRDE measurements were performed at a rotation speed of 1600 rpm. The electric double layer capacitance was carried out with the scanning rate at 50, 80, 100, 150 and 200 mV s<sup>-1</sup>.

The electron transfer number  $n$  and H<sub>2</sub>O<sub>2</sub> yield was calculated by the following equations:

$$n = 4 * \frac{I_D}{I_D + I_R/N}$$

$$H_2O_2 = 200 * \frac{I_R/N}{I_D + I_R/N} \quad (N = 42.4\%)$$

Herein,  $I_R$  and  $I_D$  are ring and disk current, respectively.  $N$  is the collection efficiency of ring electrode and measured to be 42.4%.

## 2.5 The density functional theory calculation of the ORR catalytic process

All DFT calculations were performed on the basis of  $\omega$ B97XD<sup>2</sup>/BSI level by Gaussian 09 D.01 software package. The BSI denotes a mixed basis set, which uses 6-311G(D)<sup>3</sup> basis set for non-metal atoms, and LANL2TZ<sup>4</sup> basis set for the metal atoms. Geometry optimizations were performed until the total energy converged to within  $1 \times 10^{-6}$  Ha, and the forces on all atoms were less than 0.0017 a.u.. The single point energy ( $E$ ) of the optimized structure was taken into calculating the adsorption energy. The ORR mechanism was investigated according to *Noskov* model. Each step energy was calculated by the following equations:

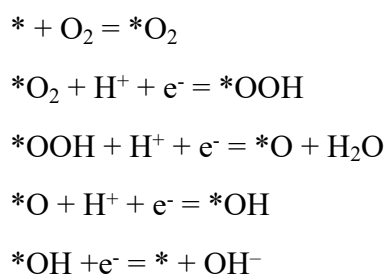

where  $*$  denotes the M-TP-COF catalyst. The adsorption energy ( $E_{ad}$ ) of the adsorbates O<sub>2</sub> with M-TP-COFs were calculated according to the following equation:

$E_{ad} = E_{por+lig} - E_{por} - E_{lig}$ , where  $E_{por+lig}$  is the energy of the optimized binding

complex, and  $E_{\text{por}}$  and  $E_{\text{lig}}$  refer to the energy of the M-TP-COF substrate and the adsorbate, respectively.

### 3. Supplementary figures and tables

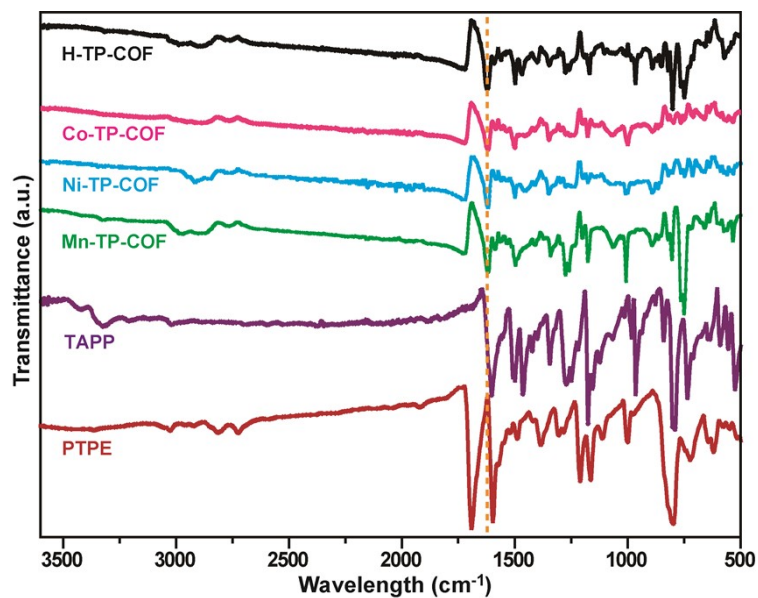

**Fig. S1** FT-IR spectra of H-TP-COF (black line), Co-TP-COF (pink line), Ni-TP-COF (blue line), Mn-TP-COF (green line), TAPP (purple line) and PTPE (red line).

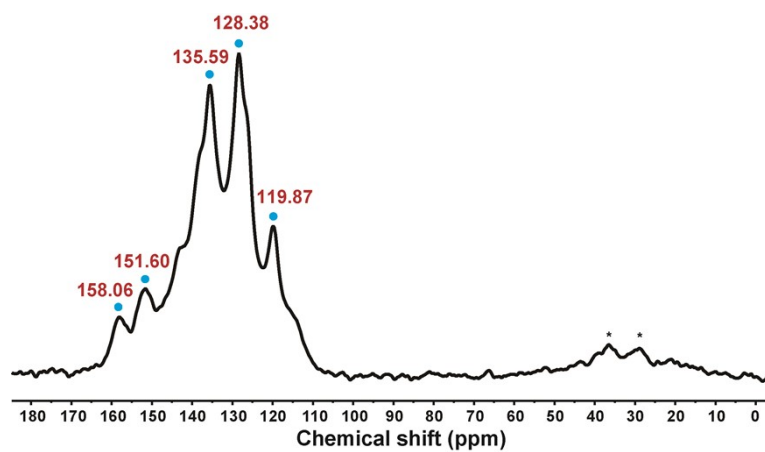

**Fig. S2** The solid-state <sup>13</sup>C NMR spectrum of H-TP-COF.

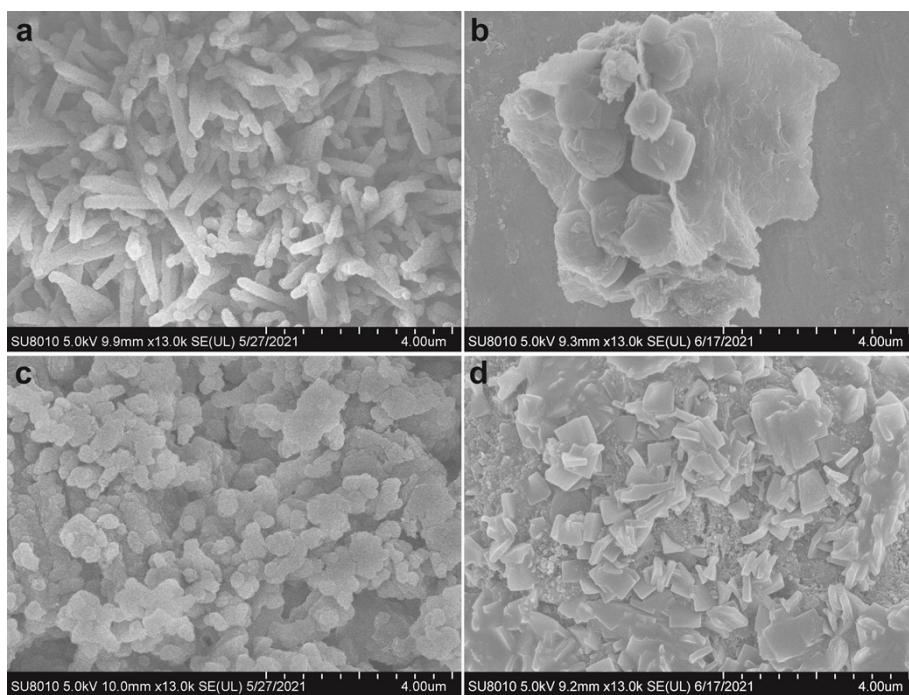

**Fig. S3** SEM images of (a) H-TP-COF, (b) Co-TP-COF, (c) Ni-TP-COF and (d) Mn-TP-COF.



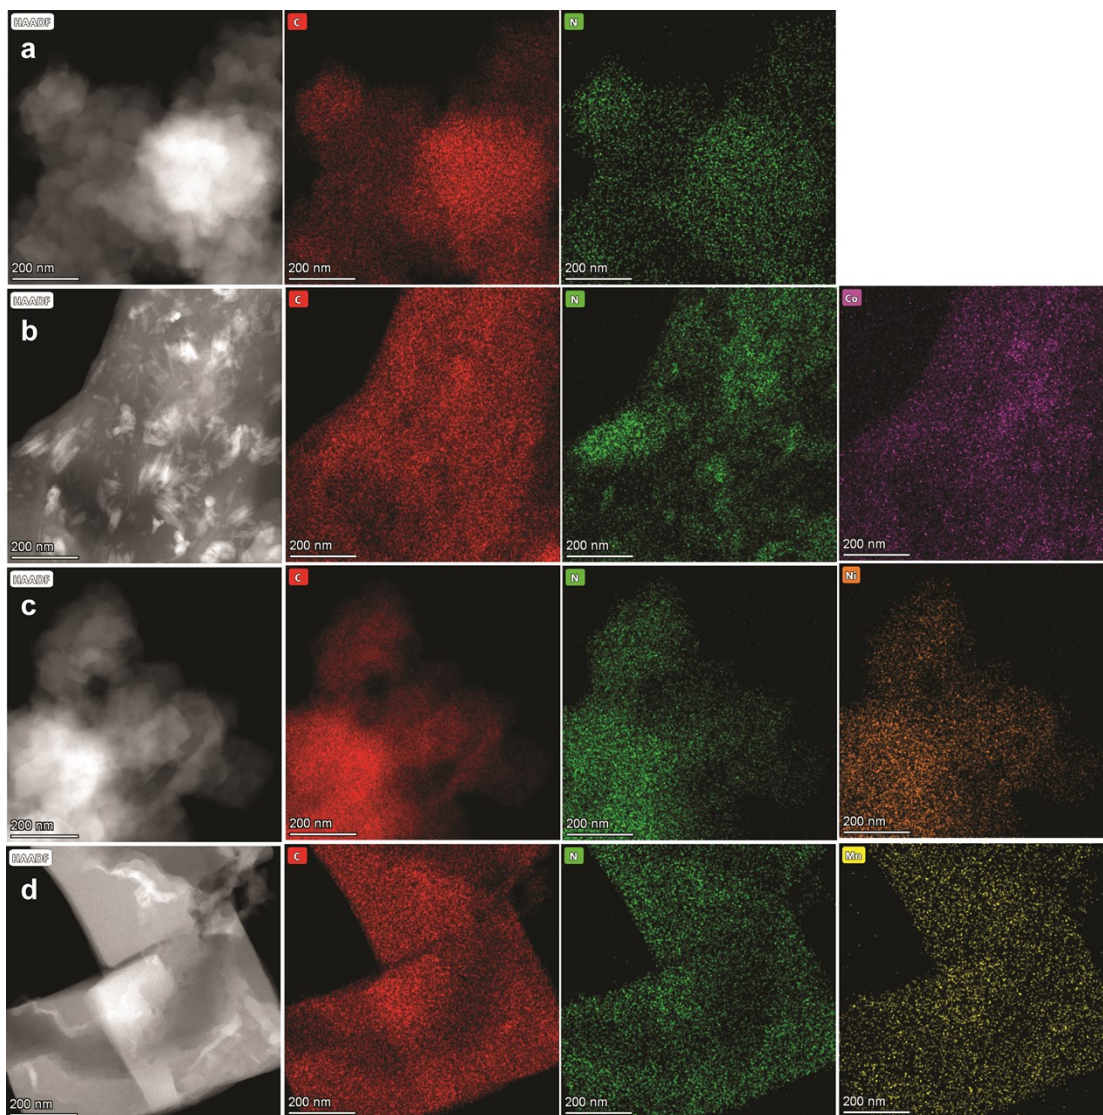

**Fig. S4** HRTEM images and corresponding elemental mapping images of (a) H-TP-COF, (b) Co-TP-COF, (c) Ni-TP-COF and (d) Mn-TP-COF.

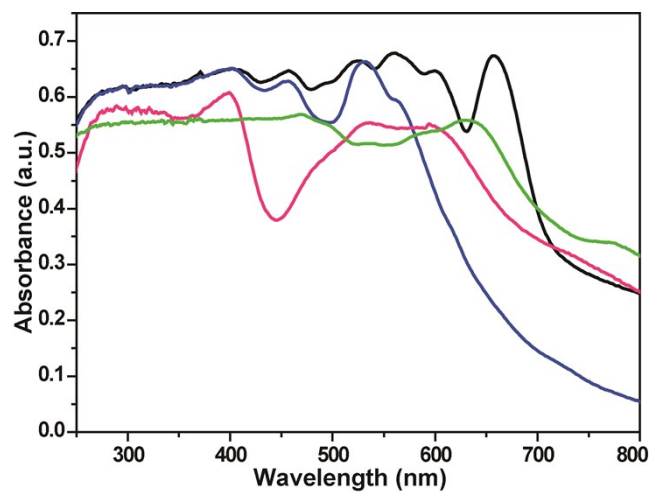

**Fig. S5** UV-vis absorption spectra of H-TP-COF (black line), Co-TP-COF (pink line), Ni-TP-COF (blue line) and Mn-TP-COF (green line).

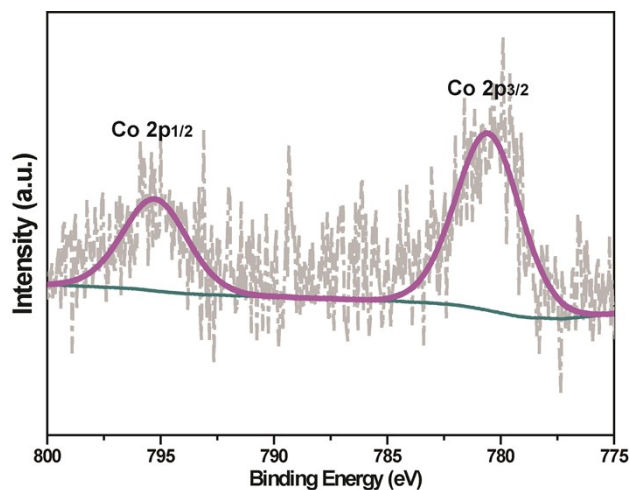

**Fig. S6** XPS spectra of Co 2p in Co-TP-COF and the peaks are 795.26 eV and 780.57 eV.

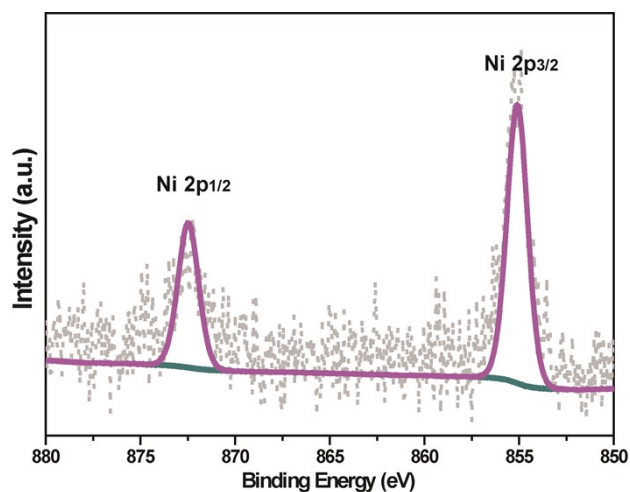

**Fig. S7** XPS spectra of Ni 2p in Ni-TP-COF and the peaks are 872.43 eV and 855.15 eV.

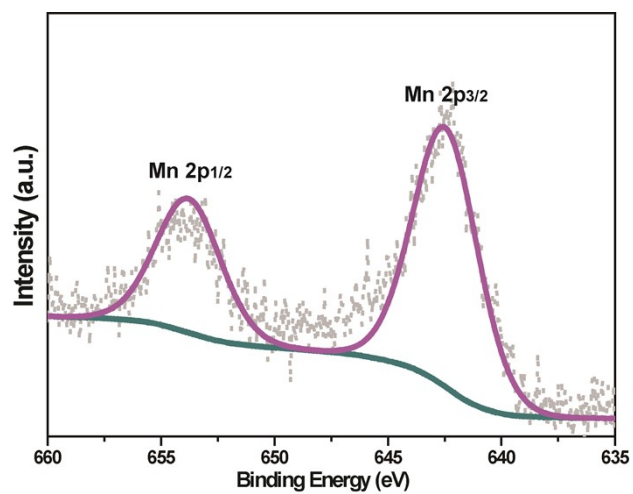

**Fig. S8** XPS spectra of Mn 2p in Mn-TP-COF and the peaks are 653.79 eV and 642.47 eV.

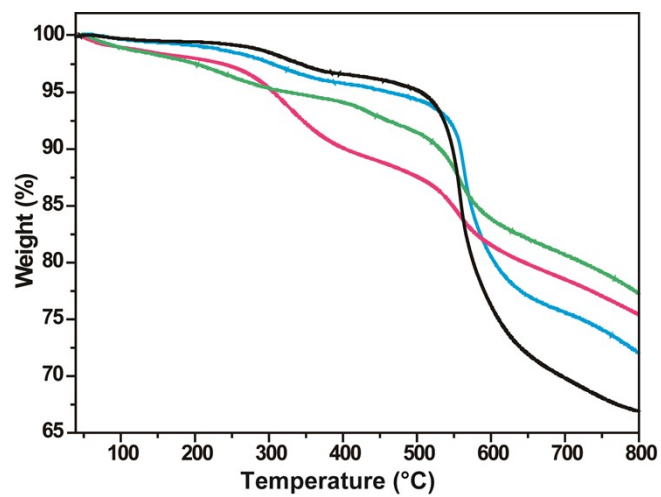

**Fig. S9** TGA curves of H-TP-COF (black line), Co-TP-COF (pink line), Ni-TP-COF (blue line) and Mn-TP-COF (green line).

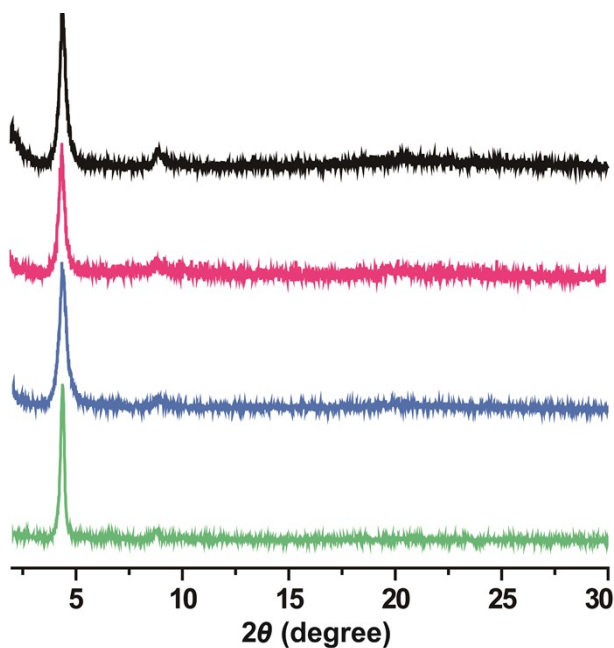

**Fig. S10** PXR D patterns of H-TP-COF (black line), Co-TP-COF (pink line), Ni-TP-COF (blue line) and Mn-TP-COF (green line) after soaked in 0.1 M KOH for 24 h.

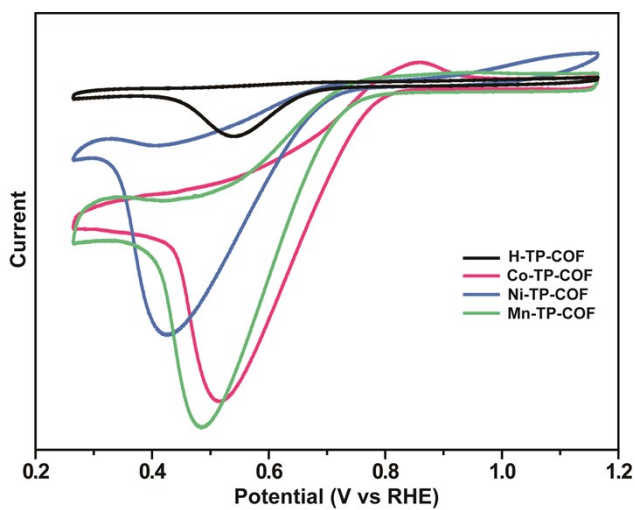

**Fig. S11** CV curves of H-TP-COF, Co-TP-COF, Ni-TP-COF and Mn-TP-COF at a scan rate of 50 mV s<sup>-1</sup> in O<sub>2</sub>-saturated 0.1 M KOH solution.

| COF-based electrocatalyst    | pyrolysis or not | electrolyte               | onset potential (V) vs RHE | half-wave potential (V) vs RHE | diffusion-limited current density ( $\text{mA cm}^{-2}$ ) | references                                   |
|------------------------------|------------------|---------------------------|----------------------------|--------------------------------|-----------------------------------------------------------|----------------------------------------------|
| Co-TP-COF                    | no               | KOH (0.1 M)               | 0.81                       | 0.73                           | 4.8                                                       | this work                                    |
| Mn-TP-COF                    | no               | KOH (0.1 M)               | 0.75                       | 0.68                           | 5                                                         |                                              |
| Ni-TP-COF                    | no               | KOH (0.1 M)               | 0.72                       | 0.66                           | 2.2                                                       |                                              |
| H-TP-COF                     | no               | KOH (0.1 M)               | 0.71                       | 0.65                           | 2.3                                                       |                                              |
| COP-PSO <sub>3</sub> -Co-rGO | no               | KOH (0.1 M)               | 0.88                       | /                              | /                                                         | <i>Angew. Chem. Int. Ed.</i> 2018, 57, 12567 |
| COP-P-SO <sub>3</sub> Co     | no               | KOH (0.1 M)               | 0.68                       | /                              | /                                                         |                                              |
| Pt@COF                       | no               | HClO <sub>4</sub> (0.1 M) | 1.05                       | 0.89                           | 5.52                                                      | <i>Chem. Mater.</i> 2020, 32, 9747           |
| JUC-528                      | no               | KOH (0.1 M)               | /                          | 0.7                            | /                                                         | <i>J. Am. Chem. Soc.</i> 2020, 142, 8104     |
| 1''-NP                       | yes              | KOH (0.1 M)               | /                          | 0.81                           | 5.5                                                       | <i>ACS Appl. Nano Mater.</i> 2020, 3, 5481   |
| 2''-NP                       | yes              | KOH (0.1 M)               | /                          | 0.67                           | 3.5                                                       |                                              |
| 3''-NP                       | yes              | KOH (0.1 M)               | /                          | 0.68                           | 3.4                                                       |                                              |
| 4''-NP                       | yes              | KOH (0.1 M)               | /                          | 0.7                            | 4.7                                                       |                                              |
| Fe-ISAS/CN                   | yes              | KOH (0.1 M)               | /                          | 0.861                          | 5.47                                                      | <i>Chem. Sci.</i> 2020, 11, 786              |
| CN                           | yes              | KOH (0.1 M)               | /                          | 0.633                          | /                                                         |                                              |
| C-Fe,Co-COF                  | yes              | KOH (0.1 M)               | 0.89                       | 0.81                           | 6.1                                                       | <i>Chem. Eur. J.</i> 2019, 25, 3105          |
| C-COF                        | yes              | KOH (0.1 M)               | 0.86                       | 0.73                           | 4.6                                                       |                                              |
| C-Fe-COF                     | yes              | KOH (0.1 M)               | 0.73                       | 0.55                           | 3.2                                                       |                                              |
| C-Co-COF                     | yes              | KOH (0.1 M)               | 0.86                       | 0.79                           | 5.1                                                       |                                              |

**Tab. S1** The ORR performance of M-TP-COFs and other reported COF-based electrocatalysts.

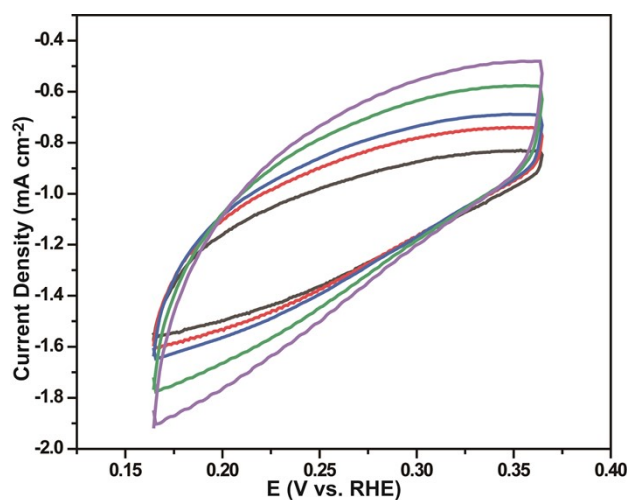

**Fig. S12** CV curves of H-TP-COF at different scan rate (black line:  $50 \text{ mV s}^{-1}$ ; red line:  $80 \text{ mV s}^{-1}$ ; blue line:  $100 \text{ mV s}^{-1}$ ; green line:  $150 \text{ mV s}^{-1}$ ; purple line:  $200 \text{ mV s}^{-1}$ ) in 0.1 M KOH solution.

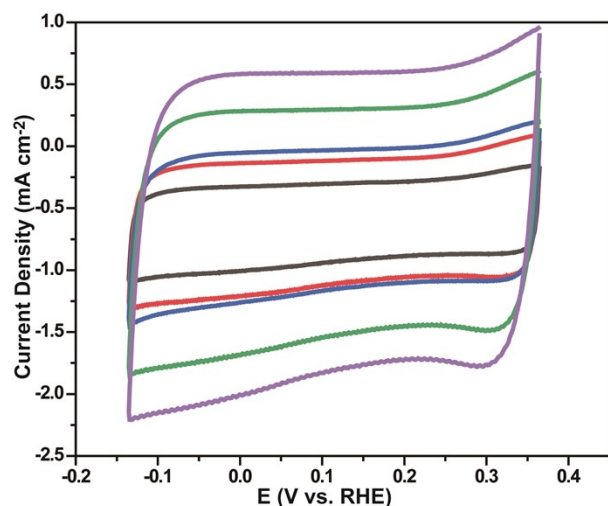

**Fig. S13** CV curves of Co-TP-COF at different scan rate (black line: 50 mV s<sup>-1</sup>; red line: 80 mV s<sup>-1</sup>; blue line: 100 mV s<sup>-1</sup>; green line: 150 mV s<sup>-1</sup>; purple line: 200 mV s<sup>-1</sup>) in 0.1 M KOH solution.

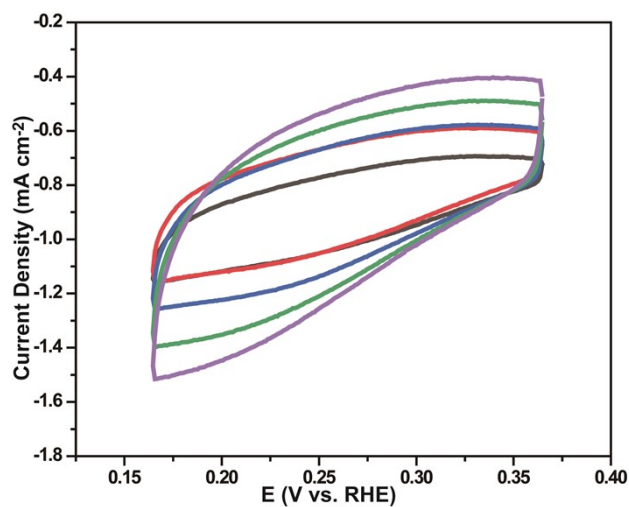

**Fig. S14** CV curves of Ni-TP-COF at different scan rate (black line: 50 mV s<sup>-1</sup>; red line: 80 mV s<sup>-1</sup>; blue line: 100 mV s<sup>-1</sup>; green line: 150 mV s<sup>-1</sup>; purple line: 200 mV s<sup>-1</sup>) in 0.1 M KOH solution.

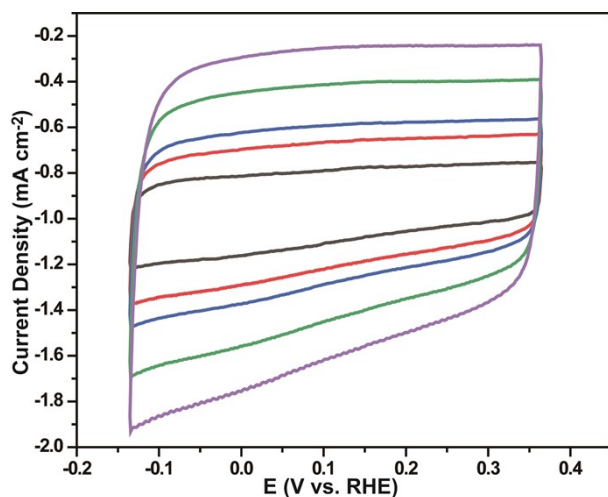

**Fig. S15** CV curves of Mn-TP-COF at different scan rate (black line:  $50 \text{ mV s}^{-1}$ ; red line:  $80 \text{ mV s}^{-1}$ ; blue line:  $100 \text{ mV s}^{-1}$ ; green line:  $150 \text{ mV s}^{-1}$ ; purple line:  $200 \text{ mV s}^{-1}$ ) in  $0.1 \text{ M KOH}$  solution.

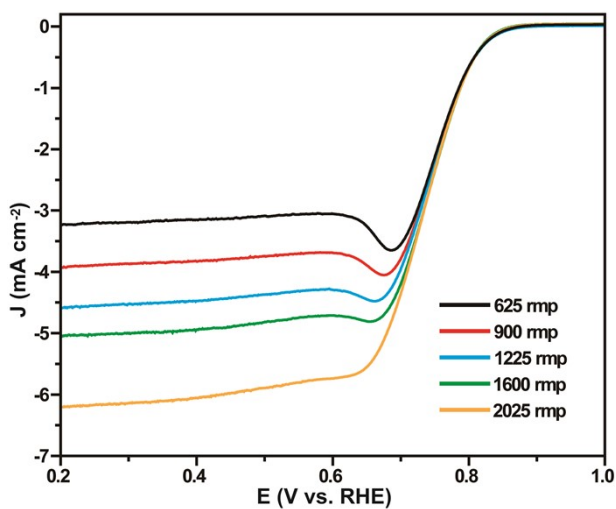

**Fig. S16** LSV curves of Co-TP-COF at different rotation speed.

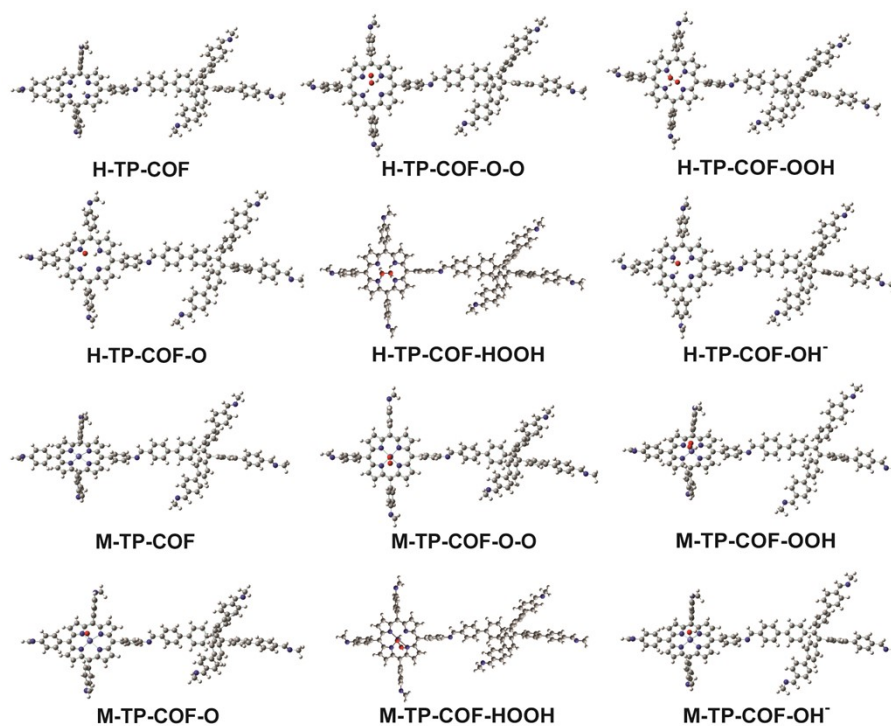

**Fig. S17** Computational models of H-TP-COF and M-TP-COF (M = Co, Ni and Mn) used in DFT calculations.

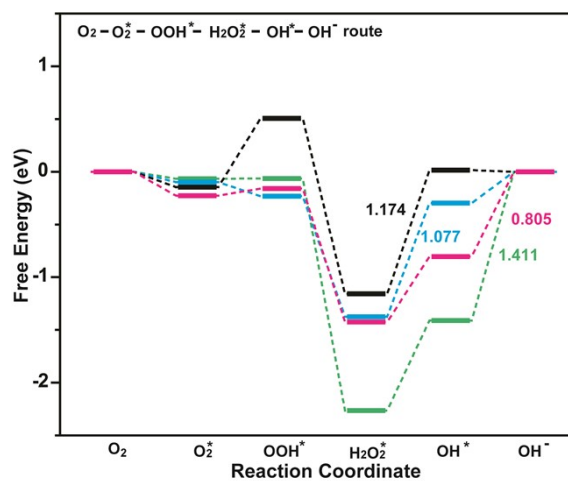

**Fig. S18** Gibbs free energy curves of H-TP-COF (black line), Co-TP-COF (pink line), Ni-TP-COF (blue line) and Mn-TP-COF (green line) in the ORR process by  $O_2$ - $O_2^*$ - $OOH^*$ - $H_2O_2^*$ - $OH^*$ - $OH^-$  route in alkaline medium.



Lattice parameters

a = 25.93 Å

b = 31.31 Å

c = 5.59 Å

$\alpha = \beta = \gamma = 90^\circ$

□

□

□

□

□

□

| Atom | x        | y        | z        |
|------|----------|----------|----------|
| H1   | 0.047964 | 0.165679 | 0.480798 |
| H2   | 0.172293 | 0.193071 | 0.054511 |
| H3   | 0.107782 | 0.132522 | 0.078711 |
| H4   | 0.579476 | 0.627367 | 0.865762 |
| H5   | 0.524619 | 0.560828 | 0.850451 |
| H6   | 0.594654 | 0.526284 | 0.159677 |
| H7   | 0.648331 | 0.593511 | 0.170561 |
| H8   | 0.626718 | 0.323279 | 0.820654 |
| H9   | 0.684161 | 0.258242 | 0.792761 |
| H10  | 0.73858  | 0.300844 | 0.085013 |
| H11  | 0.681328 | 0.365672 | 0.113557 |
| H12  | 0.766784 | 0.15748  | 0.237628 |
| H13  | 0.831595 | 0.097486 | 0.212241 |
| H14  | 0.762992 | 0.229117 | 0.228912 |
| H15  | 0.803218 | 0.049845 | 0.545035 |
| H16  | -0.04796 | -0.16568 | 0.480798 |
| H17  | -0.17229 | -0.19307 | 0.054511 |
| H18  | -0.10778 | -0.13252 | 0.078711 |
| H19  | -0.57948 | -0.62737 | 0.865762 |
| H20  | -0.52462 | -0.56083 | 0.850451 |
| H21  | -0.59465 | -0.52628 | 0.159677 |
| H22  | -0.64833 | -0.59351 | 0.170561 |
| H23  | -0.62672 | -0.32328 | 0.820654 |
| H24  | -0.68416 | -0.25824 | 0.792761 |
| H25  | -0.73858 | -0.30084 | 0.085013 |
| H26  | -0.68133 | -0.36567 | 0.113557 |
| H27  | -0.76678 | -0.15748 | 0.237628 |
| H28  | -0.8316  | -0.09749 | 0.212241 |
| H29  | -0.76299 | -0.22912 | 0.228912 |
| H30  | -0.80322 | -0.04985 | 0.545035 |
| H31  | -0.04796 | 0.165679 | -0.4808  |
| H32  | -0.17229 | 0.193071 | -0.05451 |
| H33  | -0.10778 | 0.132522 | -0.07871 |
| H34  | -0.57948 | 0.627367 | -0.86576 |
| H35  | -0.52462 | 0.560828 | -0.85045 |

|     |          |          |          |
|-----|----------|----------|----------|
| H36 | -0.59465 | 0.526284 | -0.15968 |
| H37 | -0.64833 | 0.593511 | -0.17056 |
| H38 | -0.62672 | 0.323279 | -0.82065 |
| H39 | -0.68416 | 0.258242 | -0.79276 |
| H40 | -0.73858 | 0.300844 | -0.08501 |
| H41 | -0.68133 | 0.365672 | -0.11356 |
| H42 | -0.76678 | 0.15748  | -0.23763 |
| H43 | -0.8316  | 0.097486 | -0.21224 |
| H44 | -0.76299 | 0.229117 | -0.22891 |
| H45 | -0.80322 | 0.049845 | -0.54504 |
| H46 | 0.047964 | -0.16568 | -0.4808  |
| H47 | 0.172293 | -0.19307 | -0.05451 |
| H48 | 0.107782 | -0.13252 | -0.07871 |
| H49 | 0.579476 | -0.62737 | -0.86576 |
| H50 | 0.524619 | -0.56083 | -0.85045 |
| H51 | 0.594654 | -0.52628 | -0.15968 |
| H52 | 0.648331 | -0.59351 | -0.17056 |
| H53 | 0.626718 | -0.32328 | -0.82065 |
| H54 | 0.684161 | -0.25824 | -0.79276 |
| H55 | 0.73858  | -0.30084 | -0.08501 |
| H56 | 0.681328 | -0.36567 | -0.11356 |
| H57 | 0.766784 | -0.15748 | -0.23763 |
| H58 | 0.831595 | -0.09749 | -0.21224 |
| H59 | 0.762992 | -0.22912 | -0.22891 |
| H60 | 0.803218 | -0.04985 | -0.54504 |
| C1  | 0.026073 | 0.134271 | 0.489047 |
| C2  | 0.110847 | 0.034434 | 0.479712 |
| C3  | 0.170814 | 0.172054 | 0.22093  |
| C4  | 0.135338 | 0.138648 | 0.234079 |
| C5  | 0.617208 | 0.614057 | 0.519237 |
| C6  | 0.582814 | 0.604836 | 0.706363 |
| C7  | 0.552587 | 0.568119 | 0.698311 |
| C8  | 0.556341 | 0.540034 | 0.50406  |
| C9  | 0.59089  | 0.549098 | 0.317584 |
| C10 | 0.620812 | 0.586025 | 0.324168 |
| C11 | 0.650643 | 0.348003 | 0.467473 |
| C12 | 0.651746 | 0.318255 | 0.655106 |
| C13 | 0.683498 | 0.282345 | 0.640083 |
| C14 | 0.713524 | 0.305707 | 0.250625 |
| C15 | 0.681892 | 0.341483 | 0.265814 |
| C16 | 0.28536  | 0.275853 | 0.562848 |
| C17 | 0.833143 | 0.02369  | 0.519397 |
| C18 | 0.958697 | 0.092058 | 0.518624 |

|     |          |          |          |
|-----|----------|----------|----------|
| C19 | 0.795347 | 0.179913 | 0.58872  |
| C20 | 0.795649 | 0.152555 | 0.389154 |
| C21 | 0.831195 | 0.119305 | 0.375486 |
| C22 | 0.866539 | 0.112534 | 0.561847 |
| C23 | 0.906887 | 0.079204 | 0.538246 |
| C24 | 0.748429 | 0.238395 | 0.414507 |
| C25 | -0.02607 | -0.13427 | 0.489047 |
| C26 | -0.11085 | -0.03443 | 0.479712 |
| C27 | -0.17081 | -0.17205 | 0.22093  |
| C28 | -0.13534 | -0.13865 | 0.234079 |
| C29 | -0.61721 | -0.61406 | 0.519237 |
| C30 | -0.58281 | -0.60484 | 0.706363 |
| C31 | -0.55259 | -0.56812 | 0.698311 |
| C32 | -0.55634 | -0.54003 | 0.50406  |
| C33 | -0.59089 | -0.5491  | 0.317584 |
| C34 | -0.62081 | -0.58603 | 0.324168 |
| C35 | -0.65064 | -0.348   | 0.467473 |
| C36 | -0.65175 | -0.31826 | 0.655106 |
| C37 | -0.6835  | -0.28235 | 0.640083 |
| C38 | -0.71352 | -0.30571 | 0.250625 |
| C39 | -0.68189 | -0.34148 | 0.265814 |
| C40 | -0.28536 | -0.27585 | 0.562848 |
| C41 | -0.83314 | -0.02369 | 0.519397 |
| C42 | -0.9587  | -0.09206 | 0.518624 |
| C43 | -0.79535 | -0.17991 | 0.58872  |
| C44 | -0.79565 | -0.15256 | 0.389154 |
| C45 | -0.8312  | -0.11931 | 0.375486 |
| C46 | -0.86654 | -0.11253 | 0.561847 |
| C47 | -0.90689 | -0.0792  | 0.538246 |
| C48 | -0.74843 | -0.2384  | 0.414507 |
| C49 | -0.02607 | 0.134271 | -0.48905 |
| C50 | -0.11085 | 0.034434 | -0.47971 |
| C51 | -0.17081 | 0.172054 | -0.22093 |
| C52 | -0.13534 | 0.138648 | -0.23408 |
| C53 | -0.61721 | 0.614057 | -0.51924 |
| C54 | -0.58281 | 0.604836 | -0.70636 |
| C55 | -0.55259 | 0.568119 | -0.69831 |
| C56 | -0.55634 | 0.540034 | -0.50406 |
| C57 | -0.59089 | 0.549098 | -0.31758 |
| C58 | -0.62081 | 0.586025 | -0.32417 |
| C59 | -0.65064 | 0.348003 | -0.46747 |
| C60 | -0.65175 | 0.318255 | -0.65511 |
| C61 | -0.6835  | 0.282345 | -0.64008 |

|     |          |          |          |
|-----|----------|----------|----------|
| C62 | -0.71352 | 0.305707 | -0.25063 |
| C63 | -0.68189 | 0.341483 | -0.26581 |
| C64 | -0.28536 | 0.275853 | -0.56285 |
| C65 | -0.83314 | 0.02369  | -0.5194  |
| C66 | -0.9587  | 0.092058 | -0.51862 |
| C67 | -0.79535 | 0.179913 | -0.58872 |
| C68 | -0.79565 | 0.152555 | -0.38915 |
| C69 | -0.8312  | 0.119305 | -0.37549 |
| C70 | -0.86654 | 0.112534 | -0.56185 |
| C71 | -0.90689 | 0.079204 | -0.53825 |
| C72 | -0.74843 | 0.238395 | -0.41451 |
| C73 | 0.026073 | -0.13427 | -0.48905 |
| C74 | 0.110847 | -0.03443 | -0.47971 |
| C75 | 0.170814 | -0.17205 | -0.22093 |
| C76 | 0.135338 | -0.13865 | -0.23408 |
| C77 | 0.617208 | -0.61406 | -0.51924 |
| C78 | 0.582814 | -0.60484 | -0.70636 |
| C79 | 0.552587 | -0.56812 | -0.69831 |
| C80 | 0.556341 | -0.54003 | -0.50406 |
| C81 | 0.59089  | -0.5491  | -0.31758 |
| C82 | 0.620812 | -0.58603 | -0.32417 |
| C83 | 0.650643 | -0.348   | -0.46747 |
| C84 | 0.651746 | -0.31826 | -0.65511 |
| C85 | 0.683498 | -0.28235 | -0.64008 |
| C86 | 0.713524 | -0.30571 | -0.25063 |
| C87 | 0.681892 | -0.34148 | -0.26581 |
| C88 | 0.28536  | -0.27585 | -0.56285 |
| C89 | 0.833143 | -0.02369 | -0.5194  |
| C90 | 0.958697 | -0.09206 | -0.51862 |
| C91 | 0.795347 | -0.17991 | -0.58872 |
| C92 | 0.795649 | -0.15256 | -0.38915 |
| C93 | 0.831195 | -0.11931 | -0.37549 |
| C94 | 0.866539 | -0.11253 | -0.56185 |
| C95 | 0.906887 | -0.0792  | -0.53825 |
| C96 | 0.748429 | -0.2384  | -0.41451 |
| C97 | 0.526206 | 0.5      | 0.5      |
| C98 | -0.52621 | -0.5     | 0.5      |
| N1  | 0.761678 | 0.216089 | 0.600693 |
| N2  | -0.76168 | -0.21609 | 0.600693 |
| N3  | -0.76168 | 0.216089 | -0.60069 |
| N4  | 0.761678 | -0.21609 | -0.60069 |
| N5  | 0        | 0.065787 | 0.5      |
| N6  | 0        | -0.06579 | 0.5      |

|    |          |   |     |
|----|----------|---|-----|
| N7 | 0.080107 | 0 | 0.5 |
| N8 | -0.08011 | 0 | 0.5 |

**Tab. S2** Atomic coordinates for H-TP-COF with AA packing model.

#### 4. References

- 1 A. F. M. El-Mahdy, M. G. Mohamed, T. H. Mansoure, H.-H. Yu, T. Chen and S.-W.Kuo, *Chem. Commun.*, 2019, **55**, 14890-14893.
- 2 J.-D. Chai and M. Head-Gordon, *Phys. Chem. Chem. Phys.* 2008, **10**, 6615-6620.
- 3 A. D. McLean and G. S. Chandler, *J. Chem. Phys.* 1980, **72**, 5639-5648.
- 4 L. E. Roy, P. J. Hay, and R. L. Martin, *J. Chem. Theory Comput.* 2008, **4**, 1029-1031.
